# Supplementary material for: Composite silica nanoparticle/polyelectrolyte microcapsules with reduced permeability and enhanced ultrasound sensitivity
Source: Royal Society of Chemistry journal article supplement (doi:10.1039/c4tb01717j), 2015-01-01
Supplement: c4tb01717j1.pdf [file c4tb01717j1.pdf]

### Supporting Information

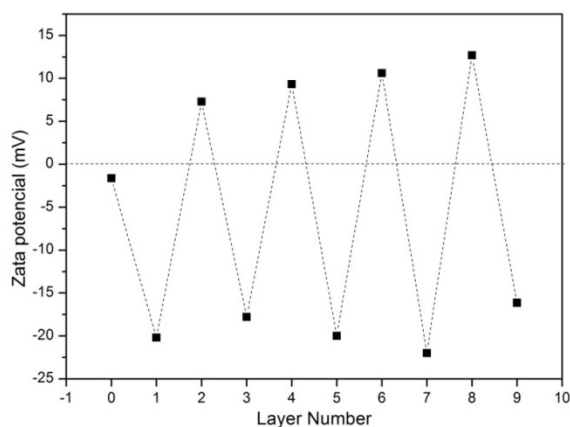

Figure S1 Zeta potential vs. layer number for the LBL self-assembly of PSS, PAH and silica coating. The layer numbers 1, 3, 5 and 7 correspond to PSS assembly and 2, 4, 6 and 8 correspond to PAH assembly. Layer number 9 corresponds to silica coating. Layer number 0 corresponds to  $\text{CaCO}_3$  cores.

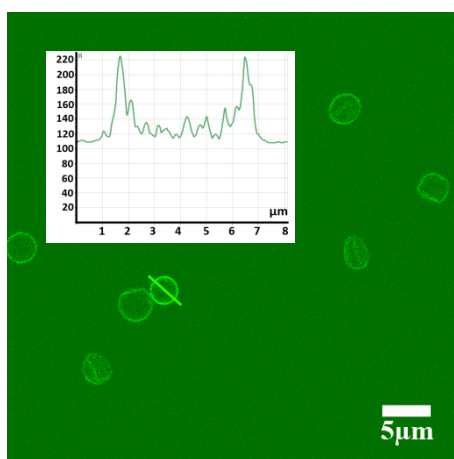

Figure S2 CLSM images of  $(\text{PSS}/\text{PAH})_3\text{PSS}$  capsules incubated in FITC solution. The line scan inset showed relative fluorescent intensity in the corresponding capsules.

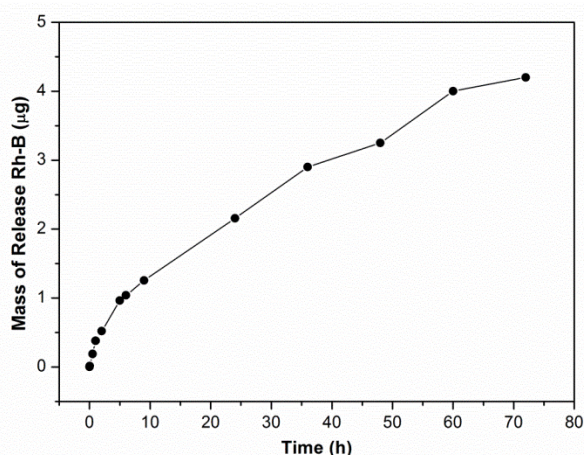

Figure S3 Mass of released Rh-B from silica/PE composite capsules without ultrasound treatment.
